# Supplementary material for: Cardiovascular Event Prediction and Risk Reclassification by Coronary, Aortic, and Valvular Calcification in the Framingham Heart Study
Source: PubMed Central journal article supplement — J Am Heart Assoc. 2016 Feb 22;5(2):e003144. doi: 10.1161/JAHA.115.003144 (PMC4802453; doi:10.1161/jaha.115.003144), 2016-02-22
Supplement: JAH3-5-e003144-s001.pdf [file JAH3-5-e003144-s001.pdf]

## SUPPLEMENTAL MATERIAL

Table S1: Cox Proportional Hazards Regression of ASCVD vs. continuous and stratified calcification measures – Interaction with age, gender and cohort

Table 1 A) For Continuous Log

|                            | <b>All cause Mortality</b><br>-Interaction<br>P-Values- |          |             | <b>Hard CHD</b> -Interaction<br>P-Values- |          |             | <b>Hard CVD</b> -Interaction<br>P-Values- |          |             |
|----------------------------|---------------------------------------------------------|----------|-------------|-------------------------------------------|----------|-------------|-------------------------------------------|----------|-------------|
| Primary Predictor Variable | With Gender                                             | With Age | With Cohort | With Gender                               | With Age | With Cohort | With Gender                               | With Age | With Cohort |
| CAC                        | 0.203                                                   | 0.445    | 0.017       | 0.881                                     | 0.290    | 0.310       | 0.457                                     | 0.949    | 0.892       |
| AAC                        | 0.759                                                   | 0.011    | 0.002       | 0.972                                     | 0.121    | 0.052       | 0.649                                     | 0.672    | 0.630       |
| TAC                        | 0.827                                                   | 0.866    | 0.389       | 0.328                                     | 0.586    | 0.582       | 0.620                                     | 0.736    | 0.644       |
| MVC                        | 0.788                                                   | 0.944    | 0.975       | 0.784                                     | 0.827    | 0.985       | 0.142                                     | 0.583    | 0.984       |
| AVC                        | 0.412                                                   | 0.998    | 0.548       | 0.472                                     | 0.497    | 0.990       | 0.459                                     | 0.573    | 0.291       |

Table 1 B) For Stratified CAC

| Outcome             | Primary Predictor Variable | With Gender | With Age |
|---------------------|----------------------------|-------------|----------|
| CVD                 | Stratified CAC             | 0.506       | 0.258    |
| CHD                 | Stratified CAC             | 0.912       | 0.290    |
| All Cause Mortality | Stratified CAC             | 0.328       | 0.103    |

All p-values are adjusted for age, sex, systolic blood pressure, hypertension treatment, diabetes, total cholesterol, HDL cholesterol, smoking (for all cause Mortality, prevalent CVD is also included as a covariate).
